# Supplementary material
Source: PubMed Central journal article supplement (PMC9338065)
Supplement: 42003_2022_3722_MOESM2_ESM.pdf [file 42003_2022_3722_MOESM2_ESM.pdf]

## Description of Additional Supplementary Files

**File name:** Supplementary Data 1

**Description:** Detailed information of global cycling genes in baboon and mouse.

**File name:** Supplementary Data 2

**Description:** Rhythmicity of core circadian gene-gene interactions.

**File name:** Supplementary Data 3

**Description:** Detailed information of body-wide network modules and their rhythmicity.

**File name:** Supplementary Data 4

**Description:** Network indices at different time points.

**File name:** Supplementary Data 5

**Description:** Details of network modules at ZT06 and ZT18.

**File name:** Supplementary Data 6

**Description:** Consensus modules and their relationship with different tissues.

**File name:** Supplementary Data 7

**Description:** Biological pathways enrichment for genes which have less connectivity at ZT06 and ZT18.

**File name:** Supplementary Data 8

**Description:** Conserved COVID-19 related cycling genes among human, mouse and baboon.

**File name:** Supplementary Data 9

**Description:** Gene sets involved in circadian rhythms, viral process and immune response.
